# Supplementary material
Source: Springer Nature journal article supplement (https://www.springermedizin.de/resource/supplementary/12882_2013_763_MOESM3_ESM.pdf/9454654)

A

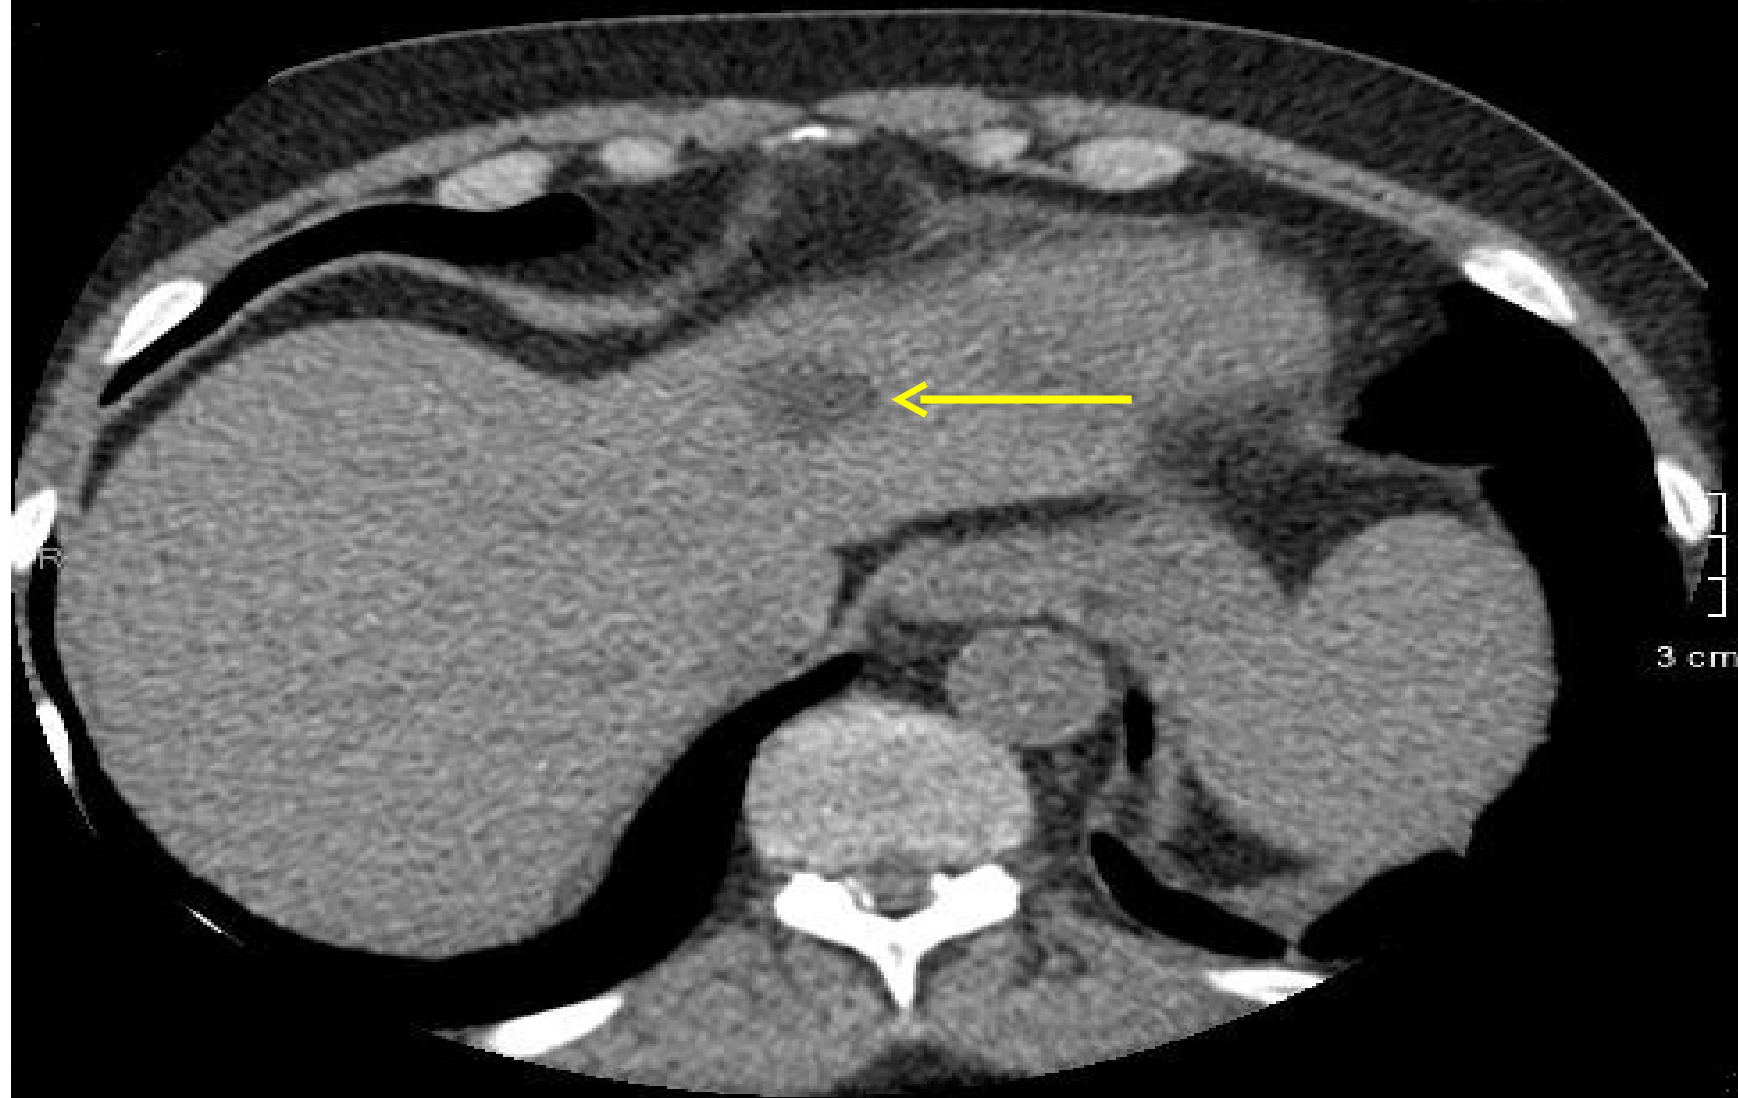

3 cm

L

Supplement: MOESM3 [file 9454654]
